# Supplementary material
Source: MDPI journal article supplement (https://www.mdpi.com/2311-7524/7/7/201)
Supplement: s1 [file s1]

# The role of Canary Island date palms in physical amenity provisioning for urban landscape settings

## Supplementary Data Tables and Images

*Dirk HR Spennemann*

Institute for Land, Water and Society; Charles Sturt University; PO Box 789; Albury NSW 2640, Australia  
email: [dspennemann@csu.edu.au](mailto:dspennemann@csu.edu.au)  
ORCID: 0000-0003-2639-7950

Supplementary data tables to  
Spennemann, D.H.R. The role of Canary Island date palms in physical amenity provisioning for urban landscape settings. *Horticulturae* **2021**, 7, 201, doi:10.3390/horticulturae7070201

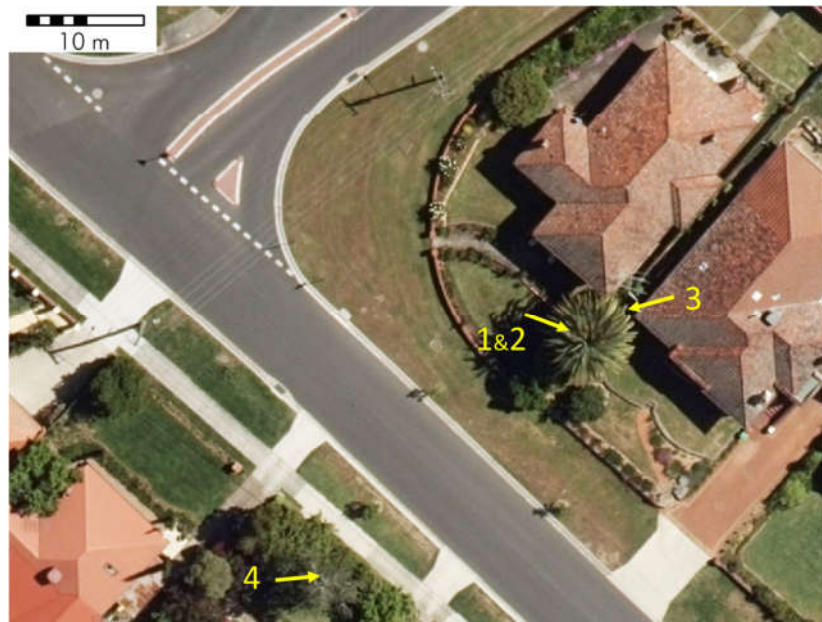

**Figure S1.** Temperature and humidity sensors as deployed in Albury (NSW). Sensors 1–2 in palm; 3–on fence; 4–in birch tree. Base image: Land and Property Information.<sup>[1]</sup>

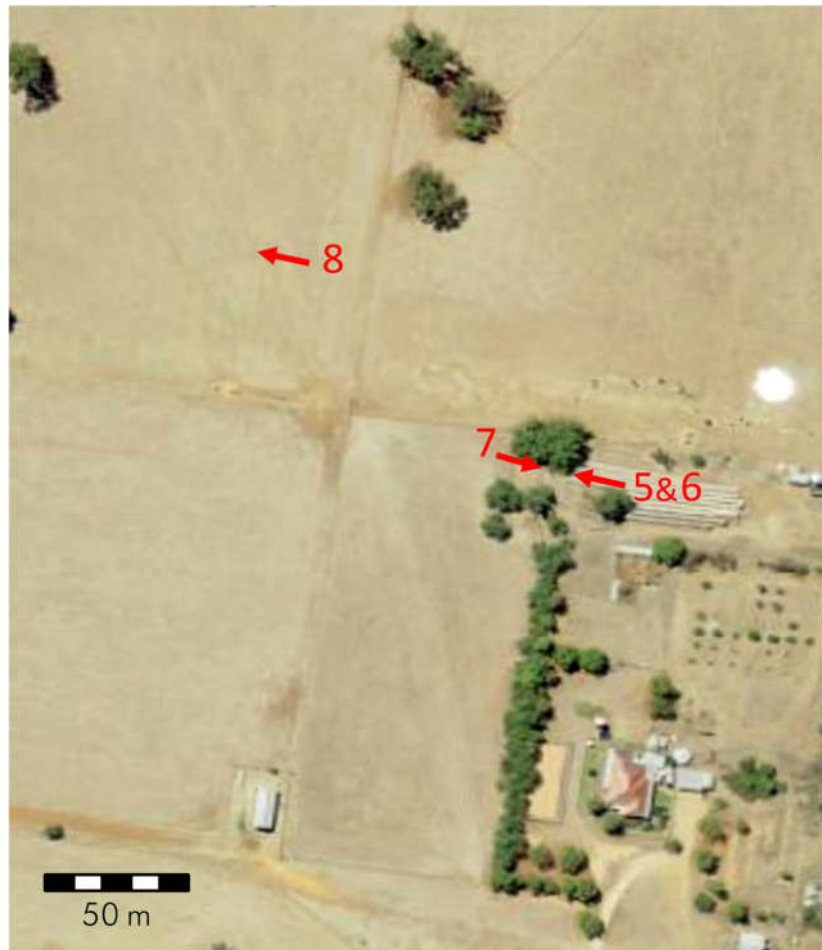

**Figure S2.** Temperature and humidity sensors as deployed at Alma Park (NSW). Sensors 5–6 in palm; 7–on fence; 8–in eucalypt tree. Base image: Land and Property Information.<sup>[2]</sup>

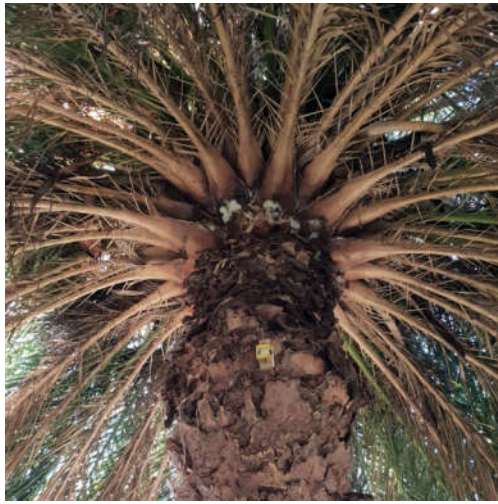

a) on stem of the palm in Albury.

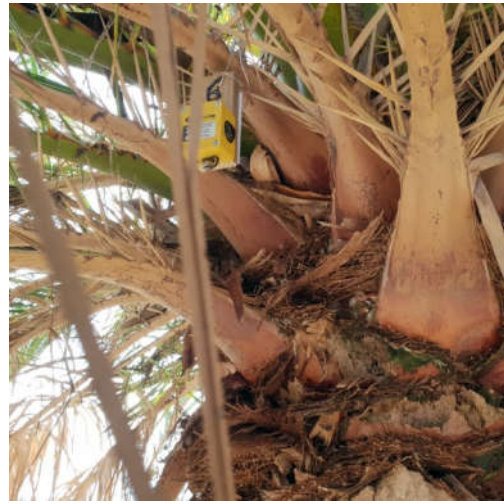

b) in the crown of the palm at Alma Park.

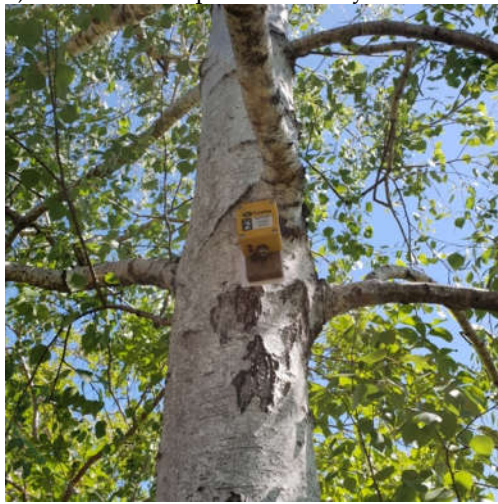

c) *Betula pendula* at Albury.

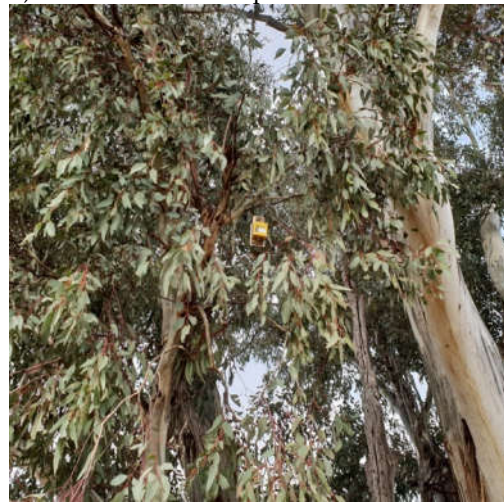

d) *Eucalyptus melliodora* at Alma Park.

**Figure S3.** Examples of temperature recorder locations (photos by the author).



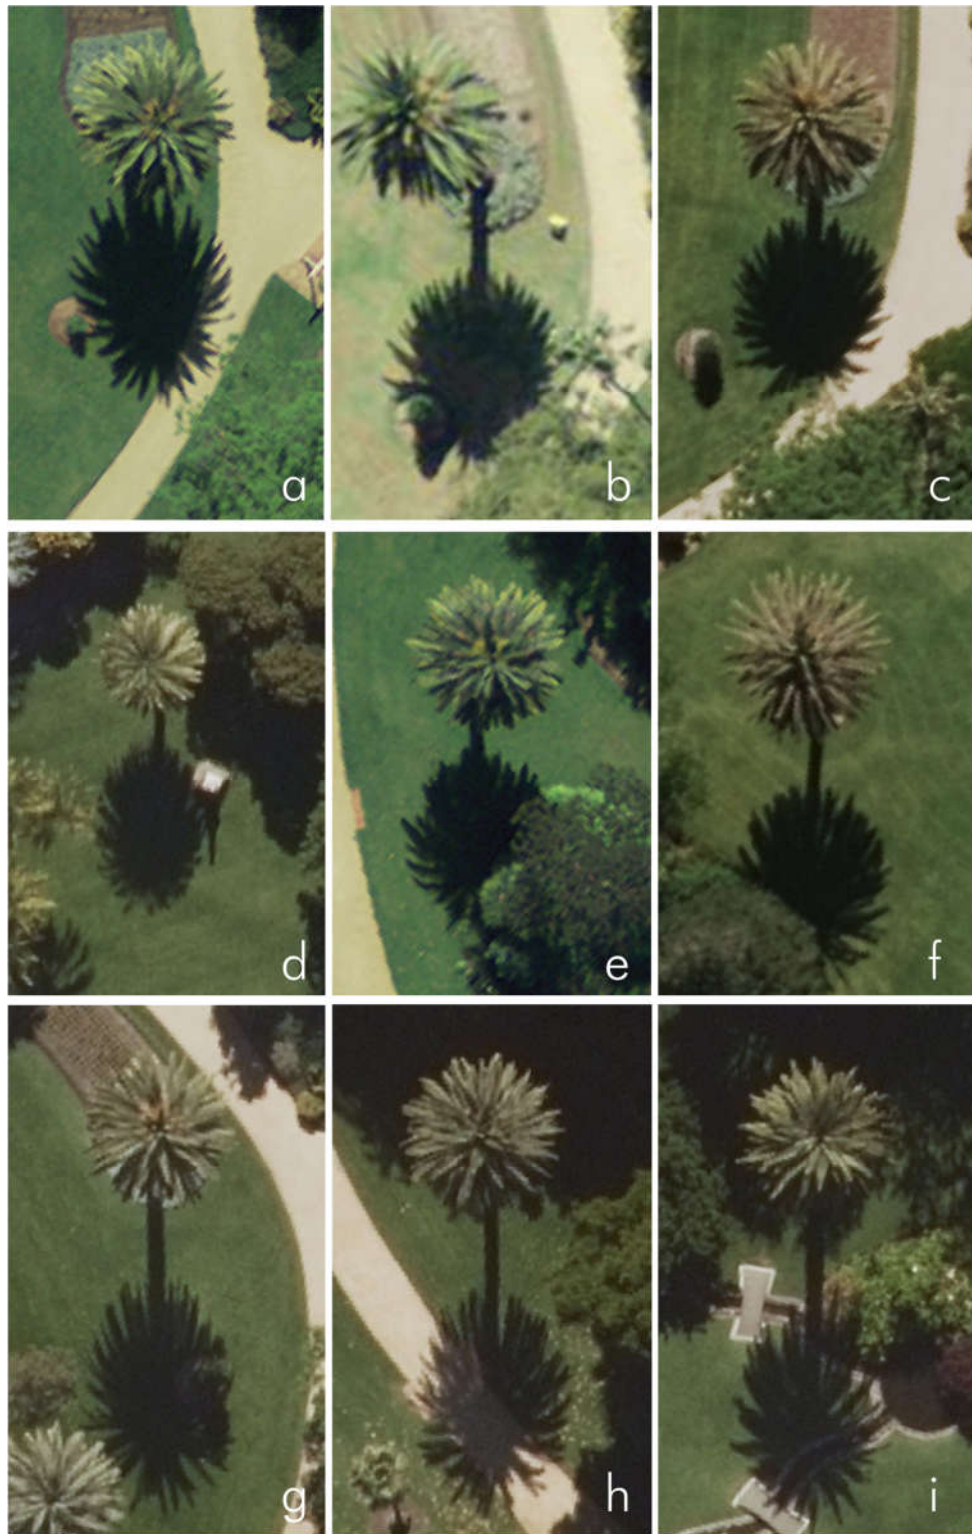

**Figure S4.** Aerial views of shadows cast by palms in the Albury Botanic Gardens 2011–a, e; 2014–b; 2015–c, f, g; 2017–d, h, i. Image sources: 2011, 2015 and 2017 aerial image Albury City; 2014 photo <sup>[1]</sup>.

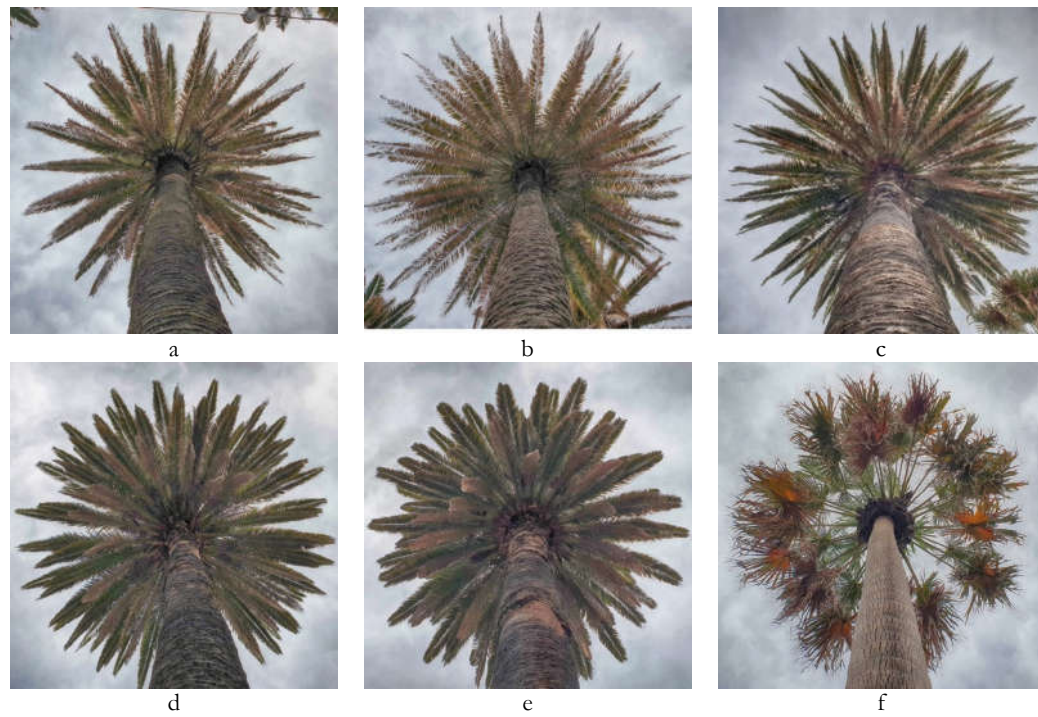

**Figure S5.** Examples of canopies seen from below. a–e Canary Island Date Palms; f–Mexican Fan Palm (The Corso, Manly, NSW, 8 June 2019).

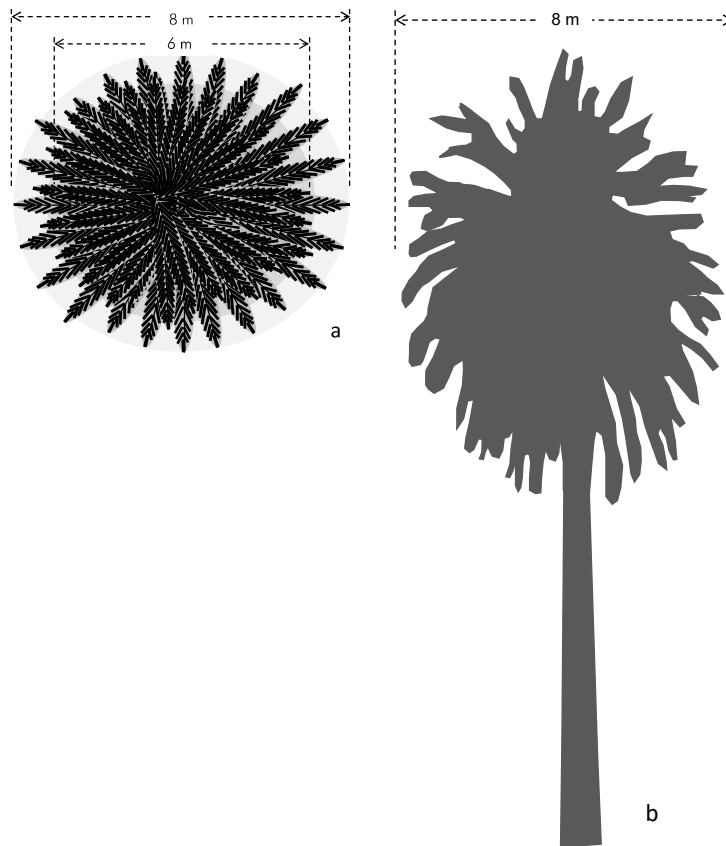

**Figure S6.** Schematic shadow pattern of a Canary Islands date palm. Top: vertical midday sun; right: low-angle late afternoon sun.

*Table S1. Observed differences in average temperature by times of day (Albury)*

|                          | Dawn               |     | Day              |      | Dusk             |     | Night            |      |
|--------------------------|--------------------|-----|------------------|------|------------------|-----|------------------|------|
|                          | Avg $\pm$ St D     | n   | Avg $\pm$ St D   | n    | Avg $\pm$ St D   | n   | Avg $\pm$ St D   | n    |
| <b>Crown vs. Control</b> |                    |     |                  |      |                  |     |                  |      |
| November                 | 0.65 $\pm$ 0.30    | 25  | -1.91 $\pm$ 2.10 | 342  | 0.64 $\pm$ 0.43  | 31  | 0.56 $\pm$ 0.28  | 178  |
| December                 | 0.50 $\pm$ 0.22    | 147 | -1.67 $\pm$ 2.08 | 1811 | 0.86 $\pm$ 0.63  | 136 | 0.61 $\pm$ 0.36  | 882  |
| January                  | 0.45 $\pm$ 0.27    | 138 | -1.44 $\pm$ 2.55 | 1808 | 0.94 $\pm$ 0.49  | 132 | 0.61 $\pm$ 0.36  | 898  |
| February                 | 0.52 $\pm$ 0.22    | 210 | -2.95 $\pm$ 3.96 | 3243 | 0.73 $\pm$ 0.38  | 233 | 0.67 $\pm$ 0.23  | 1734 |
| March                    | 0.53 $\pm$ 0.61    | 248 | -2.46 $\pm$ 4.29 | 4061 | 0.41 $\pm$ 0.76  | 310 | 0.49 $\pm$ 0.60  | 2821 |
| April                    | 0.33 $\pm$ 0.29    | 121 | -1.51 $\pm$ 2.91 | 1220 | -0.01 $\pm$ 0.29 | 80  | 0.24 $\pm$ 0.34  | 1115 |
| <b>Trunk vs. Control</b> |                    |     |                  |      |                  |     |                  |      |
| November                 | 0.652 $\pm$ 0.299  | 25  | -1.91 $\pm$ 2.10 | 342  | 0.64 $\pm$ 0.43  | 31  | 0.56 $\pm$ 0.28  | 178  |
| December                 | 0.499 $\pm$ 0.216  | 147 | -1.67 $\pm$ 2.08 | 1811 | 0.86 $\pm$ 0.63  | 136 | 0.61 $\pm$ 0.36  | 882  |
| January                  | 0.453 $\pm$ 0.275  | 138 | -1.44 $\pm$ 2.55 | 1808 | 0.94 $\pm$ 0.49  | 132 | 0.61 $\pm$ 0.36  | 898  |
| February                 | -1.345 $\pm$ 6.107 | 234 | -4.90 $\pm$ 8.05 | 3528 | -1.50 $\pm$ 7.66 | 253 | -1.47 $\pm$ 6.99 | 1922 |
| March                    | 0.526 $\pm$ 0.606  | 248 | -2.46 $\pm$ 4.29 | 4061 | 0.41 $\pm$ 0.76  | 310 | 0.49 $\pm$ 0.60  | 2821 |
| April                    | 0.331 $\pm$ 0.295  | 121 | -1.51 $\pm$ 2.91 | 1220 | -0.01 $\pm$ 0.29 | 80  | 0.24 $\pm$ 0.34  | 1115 |
| <b>Tree vs. Control</b>  |                    |     |                  |      |                  |     |                  |      |
| November                 | -0.18 $\pm$ 0.39   | 25  | 1.01 $\pm$ 2.74  | 342  | 0.04 $\pm$ 0.18  | 31  | -0.09 $\pm$ 0.23 | 178  |
| December                 | 0.05 $\pm$ 0.23    | 147 | 0.91 $\pm$ 2.53  | 1811 | 0.11 $\pm$ 0.54  | 136 | 0.06 $\pm$ 0.31  | 882  |
| January                  | 0.02 $\pm$ 0.23    | 138 | 0.93 $\pm$ 2.35  | 1808 | 0.02 $\pm$ 0.39  | 132 | 0.06 $\pm$ 0.36  | 898  |
| February                 | 0.30 $\pm$ 0.44    | 210 | -1.14 $\pm$ 3.73 | 3243 | 0.01 $\pm$ 0.35  | 233 | 0.13 $\pm$ 0.23  | 1734 |
| March                    | -0.05 $\pm$ 0.35   | 248 | -0.89 $\pm$ 2.97 | 4061 | -0.04 $\pm$ 0.37 | 310 | -0.12 $\pm$ 0.32 | 2821 |
| April                    | -0.06 $\pm$ 0.26   | 121 | -0.25 $\pm$ 2.11 | 1220 | -0.19 $\pm$ 0.21 | 80  | -0.12 $\pm$ 0.23 | 1115 |
| <b>Crown vs. Tree</b>    |                    |     |                  |      |                  |     |                  |      |
| November                 | 0.83 $\pm$ 0.34    | 25  | -2.92 $\pm$ 2.77 | 342  | 0.60 $\pm$ 0.46  | 31  | 0.65 $\pm$ 0.42  | 178  |
| December                 | 0.45 $\pm$ 0.28    | 147 | -2.58 $\pm$ 2.50 | 1811 | 0.74 $\pm$ 0.66  | 136 | 0.55 $\pm$ 0.40  | 882  |
| January                  | 0.43 $\pm$ 0.32    | 138 | -2.36 $\pm$ 2.94 | 1808 | 0.92 $\pm$ 0.60  | 132 | 0.55 $\pm$ 0.39  | 898  |
| February                 | 0.22 $\pm$ 0.46    | 210 | -1.81 $\pm$ 1.82 | 3243 | 0.72 $\pm$ 0.56  | 233 | 0.54 $\pm$ 0.31  | 1734 |
| March                    | 0.58 $\pm$ 0.63    | 248 | -1.57 $\pm$ 2.90 | 4061 | 0.45 $\pm$ 0.81  | 310 | 0.61 $\pm$ 0.69  | 2821 |
| April                    | 0.39 $\pm$ 0.41    | 121 | -1.26 $\pm$ 2.28 | 1220 | 0.18 $\pm$ 0.38  | 80  | 0.36 $\pm$ 0.46  | 1115 |

Table S2. Observed differences in average temperature by times of day (Alma Park)

|                          | Dawn       |     | Day        |      | Dusk       |      | Night      |      |
|--------------------------|------------|-----|------------|------|------------|------|------------|------|
|                          | Avg ± St D | n   | Avg ± St D | n    | Avg ± St D | n    | Avg ± St D | n    |
| <b>Crown vs. Control</b> |            |     |            |      |            |      |            |      |
| November                 | 1.68±0.97  | 89  | 1.38±0.75  | 12   | -2.78±2.37 | 171  | 1.65±0.96  | 16   |
| December                 | 1.66±0.87  | 882 | 1.62±0.85  | 147  | -2.34±2.52 | 1811 | 1.64±0.81  | 136  |
| January                  | 1.63±0.76  | 898 | 1.46±0.67  | 138  | -2.06±2.30 | 1808 | 1.61±0.71  | 132  |
| February                 | 1.53±0.63  | 210 | -2.04±2.52 | 3243 | 1.55±0.88  | 233  | 1.40±0.71  | 1734 |
| March                    | 1.27±0.61  | 248 | -1.41±1.88 | 4061 | 1.49±0.78  | 310  | 1.34±0.67  | 2821 |
| April                    | -5.21±5.81 | 121 | -5.82±3.77 | 1220 | -4.22±4.43 | 80   | -4.66±5.13 | 1115 |
| <b>Trunk vs. Control</b> |            |     |            |      |            |      |            |      |
| November                 | 1.3±0.68   | 12  | -2.17±2.18 | 171  | 1.25±0.82  | 16   | 1.42±0.83  | 89   |
| December                 | 1.47±0.78  | 147 | -1.81±2.31 | 1811 | 1.26±0.66  | 136  | 1.42±0.74  | 882  |
| January                  | 1.36±0.63  | 138 | -1.38±2.02 | 1808 | 1.24±0.54  | 132  | 1.41±0.66  | 898  |
| February                 | 1.30±0.57  | 210 | -1.09±2.10 | 3243 | 1.25±0.72  | 233  | 1.16±0.59  | 1734 |
| March                    | 1.07±0.54  | 248 | -0.58±1.80 | 4061 | 1.19±0.67  | 310  | 1.08±0.56  | 2821 |
| April                    | -5.31±5.76 | 121 | -5.44±4.21 | 1220 | -4.37±4.29 | 80   | -4.81±5.01 | 1115 |
| <b>Tree vs. Control</b>  |            |     |            |      |            |      |            |      |
| November                 | 1.84±1.14  | 89  | 1.40±0.89  | 12   | -2.95±3.04 | 171  | 1.86±1.08  | 16   |
| December                 | 1.83±1.02  | 882 | 1.81±1.06  | 147  | -2.80±3.24 | 1811 | 1.77±0.93  | 136  |
| January                  | 1.77±0.88  | 898 | 1.55±0.76  | 138  | -2.41±2.93 | 1808 | 1.76±0.87  | 132  |
| February                 | 1.87±0.79  | 210 | -2.40±3.67 | 3243 | 1.84±1.00  | 233  | 1.64±0.90  | 1734 |
| March                    | 1.55±0.76  | 248 | -1.41±2.98 | 4061 | 1.82±0.94  | 310  | 1.57±0.78  | 2821 |
| April                    | -4.61±6.45 | 121 | -5.85±4.00 | 1220 | -4.11±4.64 | 80   | -4.53±5.25 | 1115 |
| <b>Crown vs. Tree</b>    |            |     |            |      |            |      |            |      |
| November                 | -0.16±0.32 | 89  | -0.02±0.16 | 12   | 0.17±0.95  | 171  | -0.21±0.31 | 16   |
| December                 | -0.17±0.27 | 882 | -0.19±0.32 | 147  | 0.46±0.99  | 1811 | -0.13±0.21 | 136  |
| January                  | -0.15±0.24 | 898 | -0.09±0.21 | 138  | 0.36±0.88  | 1808 | -0.15±0.25 | 132  |
| February                 | -0.33±0.37 | 210 | 0.36±1.47  | 3243 | -0.29±0.32 | 233  | -0.24±0.30 | 1734 |
| March                    | -0.28±0.33 | 248 | 0.00±1.47  | 4061 | -0.33±0.29 | 310  | -0.24±0.26 | 2821 |
| April                    | -0.60±1.08 | 121 | 0.03±1.07  | 1220 | -0.11±0.33 | 80   | -0.13±0.19 | 1115 |

*Table S3. Observed differences in average humidity by times of day (Albury)*

|                          | Dawn         |     | Day          |      | Dusk         |     | Night        |      |
|--------------------------|--------------|-----|--------------|------|--------------|-----|--------------|------|
|                          | Avg ± St D   | n   | Avg ± St D   | n    | Avg ± St D   | n   | Avg ± St D   | n    |
| <b>Crown vs. Control</b> |              |     |              |      |              |     |              |      |
| November                 | -4.00±56.62  | 25  | -3.04±22.15  | 342  | -7.41±10.53  | 31  | -5.48±32.32  | 178  |
| December                 | -2.78±35.54  | 147 | -2.15±23.49  | 1811 | -11.23±15.87 | 136 | -3.00±23.80  | 882  |
| January                  | -8.62±28.68  | 138 | -8.79±18.12  | 1808 | -15.36±12.56 | 132 | -13.01±23.31 | 898  |
| February                 | -26.70±13.32 | 210 | -19.16±11.10 | 3243 | -26.26±7.15  | 233 | -27.22±11.06 | 1734 |
| March                    | -18.80±28.01 | 248 | -10.43±27.23 | 4061 | -18.57±29.12 | 310 | -19.85±28.79 | 2821 |
| April                    | -23.62±32.84 | 121 | -7.44±16.89  | 1220 | -10.35±6.82  | 80  | -17.87±26.69 | 1115 |
| <b>Trunk vs. Control</b> |              |     |              |      |              |     |              |      |
| November                 | -12.59±24.55 | 25  | -4.22±15.52  | 342  | 0.68±2.30    | 31  | -1.74±23.01  | 178  |
| December                 | 2.28±25.86   | 147 | -1.92±15.46  | 1811 | 3.97±10.79   | 136 | 4.21±21.90   | 882  |
| January                  | 4.26±19.41   | 138 | -0.73±7.02   | 1808 | 2.65±2.22    | 132 | 1.49±13.65   | 898  |
| February                 | 7.00±32.14   | 234 | -2.19±17.19  | 3528 | 2.81±12.41   | 253 | 3.15±20.71   | 1922 |
| March                    | 12.04±38.94  | 248 | -1.30±26.24  | 4061 | 0.58±25.16   | 310 | 6.49±30.81   | 2821 |
| April                    | 5.52±30.03   | 121 | -7.16±20.36  | 1220 | -10.33±8.68  | 80  | 9.97±34.71   | 1115 |
| <b>Tree vs. Control</b>  |              |     |              |      |              |     |              |      |
| November                 | 12.01±31.67  | 25  | -6.80±10.43  | 342  | -3.73±1.21   | 31  | 1.79±18.52   | 178  |
| December                 | -1.92±29.40  | 147 | -6.54±14.76  | 1811 | -3.16±4.95   | 136 | -2.56±19.66  | 882  |
| January                  | 0.14±14.35   | 138 | -6.01±8.82   | 1808 | -3.67±2.44   | 132 | -1.11±14.34  | 898  |
| February                 | -1.12±2.37   | 210 | -2.90±4.85   | 3243 | -2.20±1.78   | 233 | -1.14±6.23   | 1734 |
| March                    | 2.74±27.35   | 248 | -3.39±16.60  | 4061 | -0.10±12.99  | 310 | 3.71±18.27   | 2821 |
| April                    | -2.32±16.08  | 121 | -2.62±5.80   | 1220 | -0.50±3.04   | 80  | 0.82±9.68    | 1115 |
| <b>Crown vs. Tree</b>    |              |     |              |      |              |     |              |      |
| November                 | -16.01±45.38 | 25  | 3.76±22.16   | 342  | -3.69±9.96   | 31  | -7.26±26.02  | 178  |
| December                 | -0.87±36.41  | 147 | 4.39±24.81   | 1811 | -8.06±14.88  | 136 | -0.45±22.62  | 882  |
| January                  | -8.76±24.21  | 138 | -2.78±19.35  | 1808 | -11.69±12.70 | 132 | -11.91±16.37 | 898  |
| February                 | -25.58±13.73 | 210 | -16.26±10.29 | 3243 | -24.06±7.35  | 233 | -26.09±9.56  | 1734 |
| March                    | -21.54±32.98 | 248 | -7.04±30.00  | 4061 | -18.47±33.02 | 310 | -23.56±27.34 | 2821 |
| April                    | -21.30±37.86 | 121 | -4.82±18.66  | 1220 | -9.85±4.54   | 80  | -18.69±27.45 | 1115 |



Table S4. Observed differences in average humidity by times of day (Alma Park)

|                          | Dawn        |     | Day          |      | Dusk         |     | Night       |      |
|--------------------------|-------------|-----|--------------|------|--------------|-----|-------------|------|
|                          | Avg ± St D  | n   | Avg ± St D   | n    | Avg ± St D   | n   | Avg ± St D  | n    |
| <b>Crown vs. Control</b> |             |     |              |      |              |     |             |      |
| November                 | 29.36±51.77 | 12  | 4.1±29.25    | 171  | 13.8±11.29   | 16  | 39.48±18.67 | 89   |
| December                 | 21.09±35.48 | 147 | -13.1±37.30  | 1811 | 4.3±24.67    | 136 | 15.09±32.60 | 882  |
| January                  | 21.88±28.37 | 138 | -25.9±39.39  | 1808 | -16.33±25.23 | 132 | 2.29±24.87  | 898  |
| February                 | 32.54±28.05 | 210 | -8.13±32.68  | 3243 | 9.34±20.35   | 233 | 22.78±23.34 | 1734 |
| March                    | 19.51±38.42 | 248 | -2.71±33.18  | 4061 | 16.43±27.03  | 310 | 19.18±30.68 | 2821 |
| April                    | 22.94±36.62 | 121 | 31.37±24.71  | 1220 | 40.19±21.44  | 80  | 30.43±28.73 | 1115 |
| <b>Trunk vs. Control</b> |             |     |              |      |              |     |             |      |
| November                 | 39.73±28.40 | 12  | 7.89±29.10   | 171  | 18.63±14.45  | 16  | 23.83±32.47 | 89   |
| December                 | 25.31±33.15 | 147 | -9.30±39.85  | 1811 | 8.96±29.53   | 136 | 22.22±31.80 | 882  |
| January                  | 22.67±27.57 | 138 | -26.87±39.91 | 1808 | -16.30±28.92 | 132 | 2.82±26.61  | 898  |
| February                 | 32.11±39.13 | 210 | -8.90±34.88  | 3243 | 6.57±23.80   | 233 | 26.79±23.53 | 1734 |
| March                    | 14.29±43.99 | 248 | -4.79±33.56  | 4061 | 6.84±26.37   | 310 | 16.62±31.13 | 2821 |
| April                    | 29.73±28.42 | 121 | 25.56±24.43  | 1220 | 31.91±20.61  | 80  | 26.53±26.92 | 1115 |
| <b>Tree vs. Control</b>  |             |     |              |      |              |     |             |      |
| November                 | 36.03±42.32 | 12  | 8.49±27.42   | 171  | 16.31±11.07  | 16  | 41.13±20.15 | 89   |
| December                 | 25.93±36.89 | 147 | -8.70±38.20  | 1811 | 6.93±23.82   | 136 | 22.88±31.00 | 882  |
| January                  | 28.28±30.45 | 138 | -21.73±38.79 | 1808 | -12.35±24.75 | 132 | 7.03±27.22  | 898  |
| February                 | 31.39±31.63 | 210 | -5.58±30.40  | 3243 | 12.31±21.18  | 233 | 25.25±24.05 | 1734 |
| March                    | 25.57±35.63 | 248 | 0.15±30.30   | 4061 | 12.12±24.38  | 310 | 18.63±31.69 | 2821 |
| April                    | 16.06±37.97 | 121 | 27.82±17.73  | 1220 | 27.27±22.82  | 80  | 25.60±28.84 | 1115 |
| <b>Crown vs. Tree</b>    |             |     |              |      |              |     |             |      |
| November                 | -6.67±9.73  | 12  | -4.35±13.74  | 171  | -2.44±0.72   | 16  | -1.64±11.14 | 89   |
| December                 | -4.84±36.57 | 147 | -4.46±20.27  | 1811 | -2.55±3.09   | 136 | -7.79±23.35 | 882  |
| January                  | -6.40±21.60 | 138 | -4.19±13.77  | 1808 | -3.98±8.80   | 132 | -4.74±16.12 | 898  |
| February                 | 1.15±26.84  | 210 | -2.55±18.59  | 3243 | -2.96±10.74  | 233 | -2.47±20.08 | 1734 |
| March                    | -6.05±41.39 | 248 | -2.86±26.97  | 4061 | 4.31±22.71   | 310 | 0.54±33.49  | 2821 |
| April                    | 6.88±38.65  | 121 | 3.55±24.17   | 1220 | 12.92±16.61  | 80  | 4.83±34.13  | 1115 |

*Table S5. Significance of temperature differences between measurement locations: months.*

|     | Albury            |                   |                | Alma Park         |                   |                |
|-----|-------------------|-------------------|----------------|-------------------|-------------------|----------------|
|     | Crown vs. Control | Trunk vs. Control | Crown vs. Tree | Crown vs. Control | Trunk vs. Control | Crown vs. Tree |
| Nov | 0.000             | 0.000             | 0.000          | 0.000             | 0.000             | 0.023          |
| Dec | 0.000             | 0.000             | 0.000          | 0.000             | 0.000             | 0.000          |
| Jan | 0.000             | 0.000             | 0.000          | 0.000             | 0.000             | 0.000          |
| Feb | 0.000             | 0.000             | 0.000          | 0.000             | 0.000             | 0.000          |
| Mar | 0.000             | 0.000             | 0.000          | 0.000             | 0.000             | 0.000          |
| Apr | 0.000             | 0.000             | 0.000          | 0.000             | 0.000             | 0.000          |

*Table S6. Significance of temperature differences between measurement locations: hours of day.*

|       | Albury            |                   |                | Alma Park         |                   |                |
|-------|-------------------|-------------------|----------------|-------------------|-------------------|----------------|
|       | Crown vs. Control | Trunk vs. Control | Crown vs. Tree | Crown vs. Control | Trunk vs. Control | Crown vs. Tree |
| 00:00 | 0.000             | 0.000             | 0.000          | 0.000             | 0.000             | 0.000          |
| 01:00 | 0.000             | 0.000             | 0.000          | 0.000             | 0.000             | 0.000          |
| 02:00 | 0.000             | 0.000             | 0.000          | 0.000             | 0.000             | 0.000          |
| 03:00 | 0.000             | 0.000             | 0.000          | 0.000             | 0.000             | 0.000          |
| 04:00 | 0.000             | 0.000             | 0.000          | 0.000             | 0.000             | 0.000          |
| 05:00 | 0.001             | 0.000             | 0.027          | 0.000             | 0.000             | 0.000          |
| 06:00 | 0.000             | 0.000             | 0.000          | 0.000             | 0.000             | 0.000          |
| 07:00 | 0.000             | 0.000             | 0.000          | 0.000             | 0.906             | 0.000          |
| 08:00 | 0.000             | 0.000             | 0.000          | 0.000             | 0.000             | 0.000          |
| 09:00 | 0.000             | 0.000             | 0.000          | 0.000             | 0.000             | 0.000          |
| 10:00 | 0.000             | 0.000             | 0.000          | 0.000             | 0.000             | 0.000          |
| 11:00 | 0.000             | 0.000             | 0.000          | 0.000             | 0.000             | 0.000          |
| 12:00 | 0.867             | 0.000             | 0.000          | 0.000             | 0.000             | 0.000          |
| 13:00 | 0.000             | 0.000             | 0.000          | 0.000             | 0.000             | 0.000          |
| 14:00 | 0.000             | 0.000             | 0.000          | 0.000             | 0.000             | 0.000          |
| 15:00 | 0.000             | 0.000             | 0.000          | 0.000             | 0.000             | 0.000          |
| 16:00 | 0.000             | 0.000             | 0.000          | 0.000             | 0.000             | 0.000          |
| 17:00 | 0.000             | 0.000             | 0.000          | 0.000             | 0.000             | 0.000          |
| 18:00 | 0.000             | 0.000             | 0.000          | 0.000             | 0.000             | 0.000          |
| 19:00 | 0.000             | 0.000             | 0.000          | 0.000             | 0.000             | 0.000          |
| 20:00 | 0.000             | 0.000             | 0.000          | 0.000             | 0.000             | 0.000          |
| 21:00 | 0.000             | 0.000             | 0.000          | 0.000             | 0.000             | 0.000          |
| 22:00 | 0.000             | 0.000             | 0.000          | 0.000             | 0.000             | 0.000          |
| 23:00 | 0.000             | 0.000             | 0.000          | 0.000             | 0.000             | 0.000          |

*Table S7. Significance of humidity differences between measurement locations: months.*

|     | Albury            |                   |                | Alma Park         |                   |                |
|-----|-------------------|-------------------|----------------|-------------------|-------------------|----------------|
|     | Crown vs. Control | Trunk vs. Control | Crown vs. Tree | Crown vs. Control | Trunk vs. Control | Crown vs. Tree |
| Nov | 0.002             | 0.000             | 0.946          | 0.000             | 0.000             | 0.000          |
| Dec | 0.000             | 0.838             | 0.000          | 0.006             | 0.002             | 0.000          |
| Jan | 0.000             | 0.426             | 0.000          | 0.000             | 0.000             | 0.000          |
| Feb | 0.000             | 0.813             | 0.000          | 0.000             | 0.000             | 0.000          |
| Mar | 0.000             | 0.000             | 0.000          | 0.000             | 0.000             | 0.000          |
| Apr | 0.000             | 0.565             | 0.000          | 0.000             | 0.000             | 0.000          |

*Table S8. Significance of humidity differences between measurement locations: hours of day.*

|       | Albury            |                   |                | Alma Park         |                   |                |
|-------|-------------------|-------------------|----------------|-------------------|-------------------|----------------|
|       | Crown vs. Control | Trunk vs. Control | Crown vs. Tree | Crown vs. Control | Trunk vs. Control | Crown vs. Tree |
| 00:00 | 0.000             | 0.000             | 0.000          | 0.000             | 0.000             | 0.013          |
| 01:00 | 0.000             | 0.000             | 0.000          | 0.000             | 0.000             | 0.139          |
| 02:00 | 0.000             | 0.000             | 0.000          | 0.000             | 0.000             | 0.000          |
| 03:00 | 0.000             | 0.000             | 0.000          | 0.000             | 0.000             | 0.001          |
| 04:00 | 0.000             | 0.000             | 0.000          | 0.000             | 0.000             | 1.000          |
| 05:00 | 0.000             | 0.000             | 0.000          | 0.000             | 0.000             | 0.044          |
| 06:00 | 0.000             | 0.000             | 0.000          | 0.000             | 0.000             | 0.036          |
| 07:00 | 0.000             | 0.000             | 0.000          | 0.000             | 0.000             | 0.000          |
| 08:00 | 0.000             | 0.973             | 0.002          | 0.000             | 0.000             | 0.160          |
| 09:00 | 0.000             | 0.000             | 1.000          | 0.000             | 0.000             | 0.014          |
| 10:00 | 0.000             | 0.000             | 0.996          | 0.002             | 0.012             | 0.538          |
| 11:00 | 0.000             | 0.000             | 0.018          | 0.000             | 0.000             | 0.022          |
| 12:00 | 0.000             | 0.000             | 0.000          | 0.000             | 0.000             | 0.000          |
| 13:00 | 0.000             | 0.000             | 0.000          | 0.000             | 0.000             | 0.000          |
| 14:00 | 0.000             | 0.000             | 0.000          | 0.000             | 0.000             | 0.000          |
| 15:00 | 0.000             | 0.000             | 0.000          | 0.000             | 0.000             | 0.000          |
| 16:00 | 0.000             | 0.000             | 0.000          | 0.000             | 0.000             | 0.000          |
| 17:00 | 0.000             | 0.000             | 0.000          | 0.000             | 0.000             | 0.108          |
| 18:00 | 0.000             | 0.935             | 0.000          | 0.000             | 0.000             | 0.056          |
| 19:00 | 0.000             | 0.060             | 0.000          | 0.325             | 0.003             | 0.970          |
| 20:00 | 0.000             | 1.000             | 0.000          | 0.000             | 0.000             | 0.190          |
| 21:00 | 0.000             | 0.007             | 0.000          | 0.000             | 0.000             | 0.567          |
| 22:00 | 0.000             | 0.281             | 0.000          | 0.000             | 0.000             | 1.000          |
| 23:00 | 0.000             | 0.000             | 0.000          | 0.000             | 0.000             | 1.000          |

*Table S9. Significance of humidity differences between measurement locations: months.*

|     | Albury            |                   |                | Alma Park         |                   |                |
|-----|-------------------|-------------------|----------------|-------------------|-------------------|----------------|
|     | Crown vs. Control | Trunk vs. Control | Crown vs. Tree | Crown vs. Control | Trunk vs. Control | Crown vs. Tree |
| Nov | 0.000             | 0.000             | 0.000          | 0.400             | 0.000             | 0.000          |
| Dec | 0.000             | 0.000             | 0.000          | 0.151             | 0.000             | 0.000          |
| Jan | 0.000             | 0.000             | 0.000          | 0.000             | 0.000             | 0.000          |
| Feb | 0.000             | 0.000             | 0.000          | 0.000             | 0.000             | 0.000          |
| Mar | 0.000             | 0.000             | 0.000          | 0.000             | 0.160             | 0.000          |
| Apr | 0.000             | 0.000             | 0.000          | 0.000             | 0.802             | 0.000          |

*Table S10. Significance of humidity differences between measurement locations: hours of day.*

|       | Albury            |                   |                | Alma Park         |                   |                |
|-------|-------------------|-------------------|----------------|-------------------|-------------------|----------------|
|       | Crown vs. Control | Trunk vs. Control | Crown vs. Tree | Crown vs. Control | Trunk vs. Control | Crown vs. Tree |
| 00:00 | 0.000             | 0.000             | 0.100          | 0.000             | 0.026             | 0.000          |
| 01:00 | 0.000             | 0.000             | 0.000          | 0.000             | 0.988             | 0.000          |
| 02:00 | 0.000             | 0.000             | 0.000          | 0.975             | 0.622             | 0.000          |
| 03:00 | 0.000             | 0.000             | 0.000          | 0.000             | 0.926             | 0.000          |
| 04:00 | 0.000             | 0.000             | 0.000          | 0.000             | 0.999             | 0.000          |
| 05:00 | 0.000             | 0.000             | 0.000          | 0.000             | 1.000             | 0.000          |
| 06:00 | 0.000             | 0.000             | 0.768          | 0.006             | 0.055             | 0.000          |
| 07:00 | 0.000             | 0.000             | 0.000          | 0.955             | 0.000             | 0.000          |
| 08:00 | 0.000             | 0.000             | 0.000          | 0.130             | 0.000             | 0.000          |
| 09:00 | 0.000             | 0.000             | 0.000          | 0.698             | 0.919             | 0.000          |
| 10:00 | 0.000             | 0.000             | 0.000          | 0.000             | 1.000             | 0.004          |
| 11:00 | 0.000             | 0.000             | 0.000          | 0.000             | 0.000             | 0.000          |
| 12:00 | 0.000             | 0.000             | 0.000          | 0.000             | 0.000             | 0.000          |
| 13:00 | 0.000             | 0.000             | 0.000          | 0.000             | 0.000             | 0.000          |
| 14:00 | 0.000             | 0.000             | 0.000          | 0.000             | 0.000             | 0.000          |
| 15:00 | 0.000             | 0.629             | 0.000          | 0.000             | 0.000             | 0.000          |
| 16:00 | 0.000             | 0.606             | 0.000          | 0.000             | 0.000             | 0.000          |
| 17:00 | 0.000             | 0.000             | 0.000          | 0.000             | 0.000             | 0.000          |
| 18:00 | 0.000             | 0.000             | 0.000          | 0.000             | 0.000             | 0.000          |
| 19:00 | 0.000             | 0.000             | 0.000          | 0.000             | 0.000             | 0.000          |
| 20:00 | 0.000             | 0.000             | 0.158          | 1.000             | 0.304             | 0.000          |
| 21:00 | 0.000             | 0.000             | 0.000          | 1.000             | 1.000             | 0.995          |
| 22:00 | 0.000             | 0.005             | 0.000          | 0.953             | 0.082             | 0.005          |
| 23:00 | 0.000             | 0.003             | 0.000          | 0.000             | 0.983             | 0.000          |

#### References

1. Land and Property Information. SIX imagery—Albury ADS40\_Towns. Image flown on 22-02-2014. Available online: <http://maps.six.nsw.gov.au> (accessed on Sep 1 2020).
2. Land and Property Information. SIX imagery—Walbundrie ADS40\_SC 24-02-2014. Available online: <http://maps.six.nsw.gov.au> (accessed on May 10 2020).
